# Supplementary material for: Unequal Effects of Myosin 5B Mutations in Liver and Intestine Determine the Clinical Presentation of Low‐Gamma‐Glutamyltransferase Cholestasis
Source: PubMed Central journal article supplement — Hepatology. 2020 Oct 14;72(4):1461–8. doi: 10.1002/hep.31430 (PMC7702107; doi:10.1002/hep.31430), 2020-10-14
Supplement: HEP-72-1461-s001.pdf [file HEP-72-1461-s001.pdf]

**Supporting Table 1.** MVID case reports

| <b>Variation</b>                                                       | <b>Patient sex</b> | <b>TPN (yes/no)</b> | <b>cholestasis (yes/no)</b> | <b>Description/ liver values</b>                                          | <b>Ref (PMID)</b> |
|------------------------------------------------------------------------|--------------------|---------------------|-----------------------------|---------------------------------------------------------------------------|-------------------|
| n.r.                                                                   | F                  | yes                 | yes                         | Bili 2.0-4.6 mg/dl                                                        | 9364305           |
| n.r.                                                                   | M                  | yes                 | yes                         | Bili 1.5-9.7 mg/dl<br>ALT 172 U/L<br>AST 149 IU/L                         | 9364305           |
| n.r.                                                                   | F                  | yes                 | yes                         | n.r.                                                                      | 23226823          |
| c.4399C>T;<br>p.Gln1467Ter                                             | M                  | yes                 | no                          | n.r.                                                                      | Ref #1            |
| n.r.                                                                   | F                  | yes                 | n.r.                        | n.r.                                                                      | 3977385           |
| n.r.                                                                   | F                  | yes                 | n.r.                        | n.r.                                                                      | 3977385           |
| c.3163_3165dup;<br>p.Leo1055dup;<br>c.2259_2262dup;<br>p.Tyr755Glyfs*9 | F                  | yes                 | no                          | n/a                                                                       | 25111220          |
| c.1222A>T;<br>p.Ile408Phe;<br>c.1582C>T;<br>p.Leu528Phe                | M                  | yes                 | yes                         | Centrolobular<br>cholestasis without<br>fibrosis or ductular<br>reactions | 25111220          |
| c.1222A>T;<br>p.Ile408Phe;<br>c.1582C>T;<br>p.Leu528Phe                | M                  | yes                 | yes                         | Centrolobular<br>cholestasis without<br>fibrosis or ductular<br>reactions | 25111220          |
| No <i>MYO5B</i> mutation<br>found                                      | M                  | yes                 | no                          | n/a                                                                       | 25111220          |
| No <i>MYO5B</i> mutation<br>found                                      | n.r.               | yes                 | yes                         | n.r.                                                                      | 25111220          |
| c.656G>T;<br>p.Arg219His;<br>c.4028T>C;<br>p.Leu1343Pro                | M                  | yes                 | no                          | n/a                                                                       | 25111220          |
| c.1347delC;<br>p.Phe450Leufs*30;<br>c.3163_3165dup;<br>p.Leu1055dup    | M                  | yes                 | no                          | n/a                                                                       | 25111220          |
| c.1347delC;<br>p.Phe450Leufs*30;<br>c.3163_3165dup;                    | F                  | yes                 | no                          | n/a                                                                       | 25111220          |

|                                                                |      |      |                                         |                                                         |          |
|----------------------------------------------------------------|------|------|-----------------------------------------|---------------------------------------------------------|----------|
| p.Leu1055dup                                                   |      |      |                                         |                                                         |          |
| n.r.                                                           | M    | yes  | yes                                     | n.r.                                                    | 27477384 |
| n.r.                                                           | M    | yes  | yes                                     | n.r.                                                    | 27682357 |
| c.5139-1G>C;<br>c.2731delC<br>p.Arg911Alafs*6;                 | n.r. | yes  | yes                                     | n.r.                                                    | 27984607 |
| Not specified                                                  | M    | yes  | no                                      | n/a                                                     | 29546954 |
| n.r.                                                           | M    | yes  | no                                      | n/a                                                     | 28707991 |
| STX3   C.739C>T;<br>p.Arg247Ter                                | M    | yes  | no                                      | n/a                                                     | 29282386 |
| n.r.                                                           | M    | yes  | yes                                     | n.r.                                                    | 30364420 |
| n.r.                                                           | M    | yes  | yes<br>(minimized<br>with fish-<br>oil) | n.r.                                                    | 21968248 |
| n.r.                                                           | M    | yes  | n.r.                                    | n.r.                                                    | 30564347 |
| n.r.                                                           | M    | yes  | n.r.                                    | n.r.                                                    | 30564347 |
| n.r.                                                           | M    | yes  | n.r.                                    | n.r.                                                    | 31049800 |
| c.1462delA;<br>p.Ile488Leufs*93                                | F    | yes  | no                                      | n/a                                                     | 31559144 |
| n.r.                                                           | M    | yes  | yes                                     | Conjugated<br>hyperbilirubemia                          | 28842815 |
| n.r.                                                           | F    | n.r. | n.r.                                    | n.r.                                                    | 28842815 |
| c.1979C>T<br>p.Pro660Leu                                       | M    | yes  | no                                      | n/a                                                     | 23648791 |
| c.445C>T;<br>p.Gln149Ter<br>r<br>c.1021C>T;<br>p.Gln341<br>Ter | M    | yes  | no                                      | n/a                                                     | 23608388 |
| n.r.                                                           | M    | yes  | No                                      | AST and total bili<br>below 2x upper limit<br>of normal | 23525737 |
| n.r.                                                           | F    | yes  | yes<br>(treated<br>with<br>SMOF)        | Bili 4mg/dl<br>normal GGT                               | 23354788 |
| n.r.                                                           | F    | yes  | no (but<br>died early)                  | n/a                                                     | 22318102 |

|       |      |                    |                            |                                                                                                                              |          |
|-------|------|--------------------|----------------------------|------------------------------------------------------------------------------------------------------------------------------|----------|
| n.r.  | n.r. | yes                | no (but died early)        | n/a                                                                                                                          | 21299349 |
| n.r.  | M    | yes                | yes                        | n.r.                                                                                                                         | 18277898 |
| n.r.  | M    | yes                | no                         | n/a                                                                                                                          | 14697977 |
| n.r.  | M    | yes                | no                         | n/a                                                                                                                          | 14697977 |
| n.r.  | F    | yes                | no (except cholelithiasis) | n.r.                                                                                                                         | 14697977 |
| n.r.  | M    | yes                | yes                        | n.r.                                                                                                                         | 14697977 |
| n.r.  | F    | yes                | no                         | n/a                                                                                                                          | 11883547 |
| n.r.  | M    | yes                | yes                        | n.r.                                                                                                                         | 11414303 |
| n.r.  | M    | yes                | n.r.                       | n.r.                                                                                                                         | 11251929 |
| n.r.  | M    | yes                | yes                        | n.r.                                                                                                                         | 11173328 |
| n.r.  | M    | n.r.               | n.r.                       | n.r.                                                                                                                         | 9822319  |
| n.r.  | M    | n.r.               | n.r.                       | n.r.                                                                                                                         | 9822319  |
| n.r.  | F    | n.r.               | n.r.                       | n.r.                                                                                                                         | 9822319  |
| n.r.  | M    | yes                | yes                        | Total bili 157-321uM<br>Conj. bili 6.8-195 uM<br>GGT 43 U/L<br>ALT 107 U/L<br>AST 127 U/L<br>AP 811 U/L<br>cirrhosis at 5 mo | 9323563  |
| n.r.  | M    | yes                | yes                        | PNALD                                                                                                                        | 9142307  |
| n.r.  | M    | n.r.               | n.r.                       | n.r.                                                                                                                         | Ref #2   |
| n.r., | M    | n.r.               | n.r.                       | n.r.                                                                                                                         | Ref #2   |
| n.r.  | F    | yes                | yes (for 2 mo)             | n.r.                                                                                                                         | 7959671  |
| n.r.  | M    | yes                | n.r.                       | n.r.                                                                                                                         | 7959671  |
| n.r.  | M    | yes                | n.r.                       | n.r.                                                                                                                         | 7959671  |
| n.r.  | M    | no (parents' wish) | n.r.                       | n.r.                                                                                                                         | 8067796  |
| n.r.  | M    | no (parents' wish) | n.r.                       | n.r.                                                                                                                         | 8067796  |
| n.r.  | M    | yes                | yes                        | n.r.                                                                                                                         | 11173328 |
| n.r.  | M    | yes                | no                         | n.r.                                                                                                                         | 25547668 |
| n.r.  | M    | yes                | no                         | n.r.                                                                                                                         | 25547668 |
| n.r.  | F    | yes                | no                         | n.r.                                                                                                                         | 25547668 |
|       | F    | yes                | no                         | n.r.                                                                                                                         | 25547668 |

|                                                         |   |     |                     |                                                               |          |
|---------------------------------------------------------|---|-----|---------------------|---------------------------------------------------------------|----------|
| c.3190C>T<br>p.Arg1064Ter;<br>c.3514C>T<br>p.Gln1172Ter | F | yes | no                  | n.r.                                                          | 25547668 |
| c.445C>T;<br>p.Gln149Ter;<br>c.5383C>T;<br>p.Arg1795Ter | M | yes | yes                 | n.r.                                                          | 25547668 |
| c.310+2dupT;<br>c.1966C>T;<br>p.Arg656Cys               | F | yes | yes                 | Increased TA, GGT,<br>bili and BA                             | 28899465 |
| c.1323-2A>G                                             | F | no  | n.r.                | n/a                                                           | 27575604 |
| c.28-?_1545+?del,<br>c.1367A>G<br>p.Asn456Ser           | F | yes | yes                 | n.r.                                                          | 21206382 |
| c.1540T>C<br>p.Cys514Arg,<br>c.4460-1G>C                | M | yes | yes                 | n.r.                                                          | 21206382 |
| c.4366C>T<br>p.Gln1456Ter                               | M | yes | no                  | n.r.                                                          | 21206382 |
| yes                                                     | F | yes | Yes (after 5<br>mo) | n.r.                                                          | 25635218 |
| n.r.                                                    | M | yes | no                  | n.r.                                                          | 11903944 |
| n.r.                                                    | M | yes | yes                 | Bili 6-8.5 mg/ml<br>Conj. 6.8 mg/ml<br>cirrhosis, cholestasis | 9740207  |
| n.r.                                                    | M | yes | yes                 | n.r.                                                          | 8732907  |
| n.r.                                                    | M | yes | no                  | n/a                                                           | 9844114  |
| n.r.                                                    | M | yes | yes                 | Bili 10.7 (direct 7.0<br>mg/dl)                               | 22152886 |
| n.r.                                                    | M | yes | yes                 | Bili 7.9 (direct 6.1<br>mg/dl)                                | 22152886 |
| n.r.                                                    | M | yes | yes                 | Cholestasis, jaundice,<br>pruritus, BSEP<br>abnormalities     | 30311684 |
| n.r.                                                    | F | yes | yes                 | Micronodular cirrhosis                                        | 10941971 |
| c.1979C>T<br>p.Pro660Leu                                | M | yes | yes                 | n.r.                                                          | 9880458  |

|                                                            |      |      |      |                                                                                         |          |
|------------------------------------------------------------|------|------|------|-----------------------------------------------------------------------------------------|----------|
| c.1979C>T<br>p.Pro660Leu                                   | M    | yes  | yes  | Focal bridging fibrosis                                                                 | 9880458  |
| c.1979C>T<br>p.Pro660Leu                                   | M    | yes  | yes  | n.r.                                                                                    | 9880458  |
| c.1979C>T<br>p.Pro660Leu                                   | F    | yes  | yes  | n.r.                                                                                    | 9880458  |
| c.1979C>T<br>p.Pro660Leu                                   | F    | yes  | n.r. | n.r.                                                                                    | 9880458  |
| n.r.                                                       | F    | yes  | no   | n/a                                                                                     | 10941974 |
| n.r.                                                       | F    | yes  | yes  | n.r.                                                                                    | 25635218 |
| n.r.                                                       | M    | yes  | no   | n/a                                                                                     | 14697977 |
| n.r.                                                       | M    | yes  | yes  | Coagulation<br>abnormalities, septal<br>and portal fibrosis                             | 14697977 |
| n.r.                                                       | F    | yes  | no   | n/a                                                                                     | 14697977 |
| n.r.                                                       | M    | yes  | yes  | Hyperbilirubinemia,<br>cholestasis, steatosis,<br>modest portal space<br>focal fibrosis | 14697977 |
| Unspecified<br>compound<br>heterozygous<br>MYO5B mutations | F    | Yes  | yes  | Hyperbilirubinemia,<br>elevated transaminase,<br>normal GGT                             | 23354788 |
| n.r.                                                       | M    | yes  | yes  | Conjugated<br>hyperbilirubinemia                                                        | 28842815 |
| Yes                                                        | F    | yes  | yes  | n.r.                                                                                    | 24375397 |
| Yes                                                        | F    | yes  | yes  | n.r.                                                                                    | 24375397 |
| Yes                                                        | M    | yes  | yes  | n.r.                                                                                    | 24375397 |
| Yes                                                        | M    | yes  | yes  | n.r.                                                                                    | 24375397 |
| Yes                                                        | M    | yes  | yes  | n.r.                                                                                    | 24375397 |
| Yes                                                        | M    | yes  | yes  | n.r.                                                                                    | 24375397 |
| Yes                                                        | F    | yes  | yes  | n.r.                                                                                    | 24375397 |
| Yes                                                        | M    | yes  | yes  | n.r.                                                                                    | 24375397 |
| <b>20x</b><br>n.r.                                         | n.r. | n.r. | no   | n.r.                                                                                    | 24375397 |

**Abbreviations used in Supporting Table 1:** n.r.: not reported, n/a: not applicable, bili: bilirubin, M: male, F: female, ITx: intestine transplantation, LITx: liver-intestine transplantation, mo:months, Ref: references, PMID: PubMed Identifier (<https://www.ncbi.nlm.nih.gov/pubmed>).

References:

- [https://adc.bmj.com/content/104/Suppl\\_3/A133.1](https://adc.bmj.com/content/104/Suppl_3/A133.1)
- [https://www.researchgate.net/publication/273684251\\_Congenital\\_Microvillous\\_Atrophy](https://www.researchgate.net/publication/273684251_Congenital_Microvillous_Atrophy)

[\\_Report\\_of\\_Two\\_Consecutive\\_Siblings\\_with\\_Complete\\_Histologic\\_Immunohistochemical\\_and\\_Detailed\\_Electron\\_Microscopic\\_Studies\\_First\\_Report\\_from\\_Iran/link/5abfd8690f7e9bfc045bef47/download](#)
